# Supplementary material for: On the interactions of alkyl 2-hydroxycarboxylic acids with alkoxysilanes 2. Complexation and esterification of di- and tricarboxylic acids
Source: Royal Society of Chemistry journal article supplement (doi:10.1039/b814488e), 2009-01-01
Supplement: b814488e.pdf [file b814488e.pdf]

## Supplementary information

### <sup>13</sup>C and <sup>1</sup>H NMR of acid/ Si(OMe)<sub>4</sub> mixtures in CD<sub>3</sub>OD – the acid and ester signals

| Acid                                        | Form             | Alpha <i>H</i>                          | Beta <i>H</i>                                             | Ester CH <sub>3</sub>               | Alpha <i>C</i>                    | Beta <i>C</i>   | Carboxyl <i>C</i> | Ester C H <sub>3</sub> |
|---------------------------------------------|------------------|-----------------------------------------|-----------------------------------------------------------|-------------------------------------|-----------------------------------|-----------------|-------------------|------------------------|
| OA+                                         | free             | -                                       | -                                                         | -                                   | -                                 | -               | 161.65            | -                      |
| Si(OMe) <sub>4</sub>                        | monomethyl ester | -                                       | -                                                         | 3.854 s                             | -                                 | -               | 160.90;<br>160.33 | 53.64                  |
|                                             | dimethyl ester   | -                                       | -                                                         | 3.863 s                             | -                                 | -               | 159.53            | 53.86                  |
|                                             | Free             | 4.480 dd,<br>J=7.78, 4.33               | 2.799 dd, J=16.13,<br>4.33;<br>2.649, J=16.05, 7.80       | -                                   | 68.45                             | 40.03           | 176.50;<br>174.11 | -                      |
| Si(OMe) <sub>4</sub>                        | monomethyl ester | 4.491 dd,<br>J=7.50, 4.50               | 2.770 dd, J=16.00,<br>4.50;<br>2.661 dd, J=16.00,<br>7.50 | 3.739 s                             | 68.61                             | 39.85           | 175.13;<br>173.83 | 51.59                  |
|                                             | dimethyl ester   | 4.507 dd,<br>J=7.25, 4.75               | 2.801 dd, J=15.00,<br>4.50;<br>2.702 dd, J=16.25,<br>7.25 | 3.739 s;<br>3.679 s                 | 68.56                             | 39.86           | 174.94;<br>172.49 | 51.59;<br>51.66        |
|                                             | TA+              | free                                    | 4.531 s                                                   | -                                   | -                                 | 73.38           | -                 | 174.70                 |
| Si(OMe) <sub>4</sub>                        | monomethyl ester | 4.510 d,<br>J=2.0;<br>4.569 d,<br>J=2.0 | -                                                         | 3.780 s                             | 73.48;<br>73.80                   | -               | 174.44;<br>173.58 | 51.60                  |
|                                             | dimethyl ester   | 4.553 s                                 | -                                                         | 3.775 s                             | 73.81                             | -               | 173.34            | 52.86                  |
|                                             | transient        | 4.484 s                                 | -                                                         | -                                   | 76.93                             | -               | 177.10            | -                      |
|                                             | TA+              | monoethyl ester                         | 4.500 d<br>J=2.5;<br>4.561 d<br>J=2.5                     | -                                   | 1.295 t, J=7.0;<br>4.239 q, J=7.0 | 73.40;<br>73.70 | -                 | 174.31;<br>173.47      |
| Si(OEt) <sub>4</sub>                        | diethylester     | 4.545 s                                 | -                                                         | 1.290 t, J=7.25;<br>4.234 q, J=7.17 | 73.74                             | -               | 173.22            | 62.48;<br>14.48        |
|                                             | transient        | 4.465 s                                 | -                                                         | -                                   | 76.82                             | -               | 177.09            | -                      |
|                                             | TA+              | free                                    | 4.495 s                                                   | -                                   | -                                 | 73.04           | -                 | 174.23                 |
| Si(OEt) <sub>4</sub> /<br>EtOD <sup>a</sup> | monoethyl        | 4.465 d,                                | -                                                         | 4.222 q, J=7.17                     | 73.13;                            | -               | 173.88;           | 61.99                  |

|                      |                     |                             |                                                                                 |                                                                                     |       |                 |                              |                                                                 |
|----------------------|---------------------|-----------------------------|---------------------------------------------------------------------------------|-------------------------------------------------------------------------------------|-------|-----------------|------------------------------|-----------------------------------------------------------------|
|                      | ester               | J=2.0;<br>4.510 d,<br>J=2.0 |                                                                                 | (-CH <sub>3</sub> );<br>1.286 t, J=7.25<br>(-OCH <sub>2</sub> -)                    | 73.40 |                 | 172.58                       | (-OCH <sub>2</sub> -);<br>14.41<br>(-CH <sub>3</sub> )          |
|                      | diethylester        | 4.494 s                     | -                                                                               | 4.222 q, J=7.17<br>(-CH <sub>3</sub> );<br>1.283 t, J=7.00<br>(-OCH <sub>2</sub> -) | 73.46 | -               | 172.33                       | 62.03<br>(-OCH <sub>2</sub> -);<br>14.41<br>(-CH <sub>3</sub> ) |
| CA+                  | free                | -                           | 2.791 d, J=15.73;<br>2.906 d, J=16.05                                           | -                                                                                   | 74.16 | 43.83           | 176.73;<br>173.44            | -                                                               |
| Si(OMe) <sub>4</sub> | monomethyl<br>ester | -                           | 2.787 d, J=15.25;<br>2.817 d, J=14.38;<br>2.918 d, J=15.63;<br>2.922 d, J=15.63 | 3.658 s                                                                             | 74.20 | 43.82;<br>44.03 | 176.56;<br>173.39;<br>171.91 | 51.60                                                           |
|                      | dimethyl<br>ester   | -                           | 2.816 d, J=15.33;<br>2.938 d, J=15.83                                           | 3.658 s                                                                             | 74.23 | 44.01           | 176.38;<br>171.87            | 52.21                                                           |

Table S1. Assignment of signals in <sup>1</sup>H and <sup>13</sup>C NMR spectra. Measured in CD<sub>3</sub>OD except <sup>a</sup> measured in C<sub>2</sub>D<sub>5</sub>OD.

When MA was incubated with MeOH or with Si(OMe)<sub>4</sub>, the concentrations of the products were calculated from the integrals of the four regions A-D in Figure 4a). The concentration of monomethyl MA was calculated as

$$[\text{monomethyl MA}]_t = \left( 1 - \frac{\text{intA}_t}{0.485} - \frac{\text{intD}_t}{0.515} \right) \times [\text{MA}]_0 \quad [\text{S1}]$$

and of diester as

$$[\text{dimethyl MA}]_t = \frac{\text{intA}_t}{0.485} \times [\text{MA}]_0 \quad [\text{S2}]$$

where intA<sub>t</sub> etc are the normalised integrals of the four regions A etc. at time t, and 0.485:0.515 is the ratio of the two left-hand peaks of the doublet of doublets to the two right-hand peaks, measured for both the pure acid and pure diester.

When CA was incubated with MeOH or with Si(OMe)<sub>4</sub>, the concentrations of the products were calculated from the integrals of the nine regions A-I in Figure 4b). The concentration of monomethyl CA was calculated as

$$[\text{monomethyl CA}]_t = \frac{\text{intB}_t + \text{intD}_t}{\text{intA}_t + \text{intB}_t + \text{intC}_t + \text{intD}_t} \times [\text{CA}]_0 \quad [\text{S3}]$$

and of diester as

$$[\text{dimethyl CA}]_t = \frac{\text{intA}_t}{0.369 \times (\text{intA}_t + \text{intB}_t + \text{intC}_t + \text{intD}_t)} \times [\text{CA}]_0 \quad [\text{S4}]$$

where  $\text{int}A_t$  etc are the normalised integrals of the nine regions A etc. at time  $t$ , and 0.369:0.631 is the ratio of the left-hand peak of the left-hand doublet to the right-hand peak of the left-hand doublet, measured for both the pure acid and pure triester so extrapolated to the diester.

### $^{13}\text{C}$ and $^1\text{H}$ NMR of acid/ $\text{Si}(\text{OMe})_4$ mixtures in $\text{CD}_3\text{OD}$ – the siloxane signals

Additional information regarding the mechanism of interaction and esterification in each case might be drawn from studying the changes in the siloxane signals. When  $\text{Si}(\text{OMe})_4$  is incubated alone in  $\text{CD}_3\text{OD}$ , slow processes of ligand exchange (3.1) and hydrolysis (3.2) are observed:

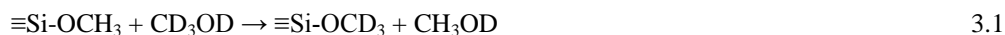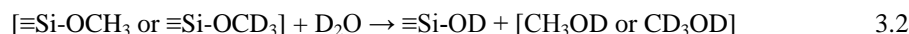

(where  $\text{D}_2\text{O}$  is derived from  $\text{H}_2\text{O}$ , which is initially present or which ingresses into the tube and exchanges its protons with the deuteriums of the more abundant  $\text{CD}_3\text{OD}$ ). Both processes lead to the loss of the  $\text{SiOCH}_3$  (3.56 ppm singlet, figure 2b) and  $\text{SiOCH}_3$  (51.6 ppm singlet, figure 2e) signals but the growth of new  $\text{CH}_3\text{OD}$  (3.35 ppm singlet) and  $\text{CH}_3\text{OD}$  (49.9 ppm singlet) signals, almost overlaying the  $\text{CHD}_2\text{OD}$  and  $\text{CD}_3\text{OD}$  signals. The ligand exchange process 3.1, additionally leads to a signal for  $\text{SiOCD}_3$  (50.8 ppm septet), which subsequently decays due to process 3.2.

In the presence of added  $\text{H}_2\text{O}$  these processes are accelerated and, because  $\equiv\text{Si}-\text{OD}$  is formed in larger quantities, condensation reactions to form  $\equiv\text{Si}-\text{O}-\text{Si}\equiv$  also become significant:

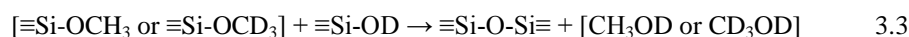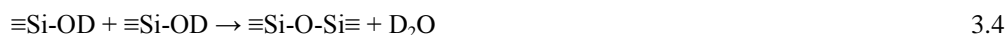

Each of these processes leads to further signals due to  $\equiv\text{Si}-\text{OCH}_3$  or  $\equiv\text{Si}-\text{OCD}_3$  within hydrolysed or oligomeric species which can also be seen in figures 2b) and 2e).

It was shown in the previous paper that the concentrations of  $\text{SiOCH}_3$ ,  $\text{SiOCD}_3$  and  $\text{CH}_3\text{O}[\text{D}/\text{H}]$  change  $\sim 1000$  fold faster in mixtures of  $\text{Si}(\text{OMe})_4$  with 2HOAs in  $\text{CD}_3\text{OD}$  than in  $\text{Si}(\text{OMe})_4 + \text{H}_2\text{O}$  in  $\text{CD}_3\text{OD}$ . All of these processes are accelerated for OA, MA, TA and CA also. Figure 5 shows the rapid growth of the  $\text{SiOCD}_3$  signal for each of these acids immediately after addition of  $\text{Si}(\text{OMe})_4$ , and its slow decay due to hydrolysis and condensation. It can be seen that the processes occur at similar rates for each acid, though the removal of  $\text{SiOCD}_3$  is perhaps slower in the case of MA. Thus, changes in the  $^1\text{H}$  and  $^{13}\text{C}$  spectra due to the siloxane species reveal little about any differences in the mechanism of reactions for the four acids.

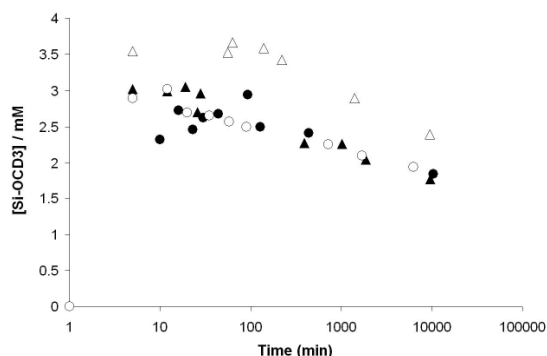

Figure S1: Changes in the concentration of  $\equiv\text{SiOCD}_3$  after  $\text{Si}(\text{OMe})_4$  (0.75 mmol) is added to  $\text{CD}_3\text{OD}$  containing 0.375 mmol of OA (open circles), MA (open triangles), TA (filled circles) or CA (filled triangles).

*ES-MS analysis of acid/Si(OMe)<sub>4</sub> mixtures in CH<sub>3</sub>OH*

| Sample                                             | Observed ions               | Assigned                                                                     | Calculated m/z<br>(difference in ppm)                     | Possible structure                                                                                                        |
|----------------------------------------------------|-----------------------------|------------------------------------------------------------------------------|-----------------------------------------------------------|---------------------------------------------------------------------------------------------------------------------------|
| OA+<br>Si(OMe) <sub>4</sub>                        | 109.9655                    | SiC <sub>4</sub> O <sub>9</sub> <sup>2-</sup>                                | 109.9661 (+6.6)                                           | 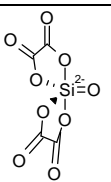 A                                       |
|                                                    | 145.9589                    | SiC <sub>6</sub> O <sub>12</sub> <sup>2-</sup>                               | 145.9585 (-2.6)                                           |  B                                       |
|                                                    | 148.9537                    | SiC <sub>2</sub> HO <sub>6</sub> <sup>-</sup>                                | 148.9548 (+7.1)                                           |  C                                       |
|                                                    | 220.9398                    | SiC <sub>4</sub> HO <sub>9</sub> <sup>-</sup>                                | 220.9395 (-1.2)                                           |  D<br>n=0, 1×R=H                        |
|                                                    | 292.9248                    | SiC <sub>6</sub> HO <sub>12</sub> <sup>-</sup>                               | 292.9243 (-1.6)                                           | B+H <sup>+</sup>                                                                                                          |
|                                                    | 314.9054                    | NaSiC <sub>6</sub> O <sub>12</sub> <sup>-</sup>                              | 314.9062 (+2.7)                                           | B+Na <sup>+</sup>                                                                                                         |
|                                                    | 432.9571                    | Si <sub>3</sub> C <sub>8</sub> H <sub>13</sub> O <sub>15</sub> <sup>-</sup>  | 432.9568 (-0.7)                                           | D, n=1, 2×R=CH <sub>3</sub> , 3×R=H                                                                                       |
|                                                    | 446.9728                    | Si <sub>3</sub> C <sub>9</sub> H <sub>15</sub> O <sub>15</sub> <sup>-</sup>  | 446.9724 (-0.9)                                           | D, n=2, 5×R=CH <sub>3</sub>                                                                                               |
|                                                    | 552.9806                    | Si <sub>4</sub> C <sub>11</sub> H <sub>21</sub> O <sub>18</sub> <sup>-</sup> | 552.9810 (+0.7)                                           | D, n=3, 7×R=CH <sub>3</sub>                                                                                               |
|                                                    | MA+<br>Si(OMe) <sub>4</sub> | 133.0143                                                                     | C <sub>4</sub> H <sub>5</sub> O <sub>5</sub> <sup>-</sup> | 133.0142 (-0.2)                                                                                                           |
| 323.0066                                           |                             | SiC <sub>9</sub> H <sub>11</sub> O <sub>11</sub> <sup>-</sup>                | 323.0076 (+2.9)                                           |  F<br>n=0, 1×R=CH <sub>3</sub> , 2×R=H |
| 337.0227                                           |                             | SiC <sub>10</sub> H <sub>13</sub> O <sub>11</sub> <sup>-</sup>               | 337.0233 (+1.8)                                           | F, n=0, 2×R=CH <sub>3</sub> , 1×R=H                                                                                       |
| 415.0009                                           |                             | Si <sub>2</sub> C <sub>10</sub> H <sub>15</sub> O <sub>14</sub> <sup>-</sup> | 415.0006 (-0.7)                                           | F, n=1, 2×R=CH <sub>3</sub> , 3×R=H                                                                                       |
| 429.0182                                           |                             | Si <sub>2</sub> C <sub>11</sub> H <sub>17</sub> O <sub>14</sub> <sup>-</sup> | 429.0162 (-4.6)                                           | F, n=1, 3×R=CH <sub>3</sub> , 2×R=H                                                                                       |
| 443.0308                                           |                             | Si <sub>2</sub> C <sub>12</sub> H <sub>19</sub> O <sub>14</sub> <sup>-</sup> | 443.0319 (+2.4)                                           | F, n=1, 4×R=CH <sub>3</sub> , 1×R=H                                                                                       |
| 535.0227                                           |                             | Si <sub>3</sub> C <sub>13</sub> H <sub>23</sub> O <sub>17</sub> <sup>-</sup> | 535.0249 (+4.0)                                           | F, n=2, 5×R=CH <sub>3</sub> , 2×R=H                                                                                       |
| 549.0392                                           |                             | Si <sub>3</sub> C <sub>14</sub> H <sub>25</sub> O <sub>17</sub> <sup>-</sup> | 549.0405 (+2.4)                                           | F, n=2, 6×R=CH <sub>3</sub> , 1×R=H                                                                                       |
| 641.0300                                           |                             | Si <sub>4</sub> C <sub>15</sub> H <sub>29</sub> O <sub>20</sub> <sup>-</sup> | 641.0335 (+5.4)                                           | F, n=3, 7×R=CH <sub>3</sub> , 2×R=H                                                                                       |
| TA+<br>Si(OMe) <sub>4</sub><br>10 min <sup>a</sup> |                             | 149.0092                                                                     | C <sub>4</sub> H <sub>5</sub> O <sub>6</sub> <sup>-</sup> | 149.0092 (-0.6)                                                                                                           |
|                                                    | 204.9810                    | Si <sub>2</sub> C <sub>10</sub> H <sub>10</sub> O <sub>14</sub> <sup>-</sup> | 204.9810 (+0.2)                                           | R=H<br> H                              |

|                      |                                                        |                                                |                                     |                                     |
|----------------------|--------------------------------------------------------|------------------------------------------------|-------------------------------------|-------------------------------------|
| 322.9701             | $\text{SiC}_8\text{H}_7\text{O}_{12}^-$                | 322.9712 (+3.4)                                |                                     | I                                   |
|                      |                                                        |                                                | R=H                                 |                                     |
| 336.9880             | $\text{SiC}_9\text{H}_9\text{O}_{12}^-$                | 336.9869 (+1.1)                                | I, R=CH <sub>3</sub>                |                                     |
| 354.9973             | $\text{SiC}_9\text{H}_{11}\text{O}_{13}$               | 354.9974 (+0.5)                                |                                     |                                     |
|                      |                                                        |                                                |                                     | J                                   |
|                      |                                                        |                                                | n=0, 1×R=CH <sub>3</sub> , 2×R=H    |                                     |
| 369.0132             | $\text{SiC}_{10}\text{H}_{13}\text{O}_{13}^-$          | 369.0131 (-0.3)                                | J, n=0, 2×R=CH <sub>3</sub> , 1×R=H |                                     |
| 378.9435             | $\text{Si}_2\text{C}_9\text{H}_7\text{O}_{13}$         | 378.9431 (-1.0)                                |                                     |                                     |
|                      |                                                        |                                                |                                     | K                                   |
|                      |                                                        |                                                | R=CH <sub>3</sub>                   |                                     |
| 383.0291             | $\text{SiC}_{11}\text{H}_{15}\text{O}_{13}^-$          | 383.0287 (-0.9)                                | J, n=0, 3×R=CH <sub>3</sub>         |                                     |
| 410.9734             | $\text{Si}_2\text{C}_{10}\text{H}_{11}\text{O}_{14}$   | 410.9693 (-10.0)                               |                                     |                                     |
|                      |                                                        |                                                |                                     | L                                   |
|                      |                                                        |                                                | n=0, 2×R=CH <sub>3</sub> , 1×R=H    |                                     |
| 461.0058             | $\text{Si}_2\text{C}_{13}\text{H}_{17}\text{O}_{16}^-$ | 461.0061 (+0.5)                                | J, n=1, 3×R=CH <sub>3</sub> , 2×R=H |                                     |
| 475.0213             | $\text{Si}_2\text{C}_{12}\text{H}_{19}\text{O}_{16}^-$ | 475.0217 (+0.9)                                | J, n=1, 4×R=CH <sub>3</sub> , 1×R=H |                                     |
| 484.9518             | $\text{Si}_3\text{C}_{11}\text{H}_{13}\text{O}_{16}$   | 484.9517 (-0.3)                                |                                     |                                     |
|                      |                                                        |                                                |                                     | M                                   |
|                      |                                                        |                                                | 3×R=CH <sub>3</sub>                 |                                     |
| 489.0370             | $\text{Si}_2\text{C}_{13}\text{H}_{21}\text{O}_{16}^-$ | 489.0374 (+0.8)                                | J, n=1, 5×R=CH <sub>3</sub>         |                                     |
| 516.9789             | $\text{Si}_3\text{C}_{12}\text{H}_{17}\text{O}_{17}^-$ | 516.9779 (-1.9)                                | L, n=1, 4×R=CH <sub>3</sub> , 1×R=H |                                     |
| 581.0305             | $\text{Si}_3\text{C}_{14}\text{H}_{25}\text{O}_{19}^-$ | 581.0303 (-0.3)                                | J, n=2, 6×R=CH <sub>3</sub> , 1×R=H |                                     |
| 622.9864             | $\text{Si}_4\text{C}_{14}\text{H}_{23}\text{O}_{20}$   | 622.9865 (+0.2)                                | L, n=2, 6×R=CH <sub>3</sub> , 1×R=H |                                     |
| 728.9950             | $\text{Si}_5\text{C}_{16}\text{H}_{29}\text{O}_{23}$   | 728.9951 (+0.2)                                | L, n=3, 8×R=CH <sub>3</sub> , 1×R=H |                                     |
| TA+                  | 149.0099                                               | $\text{C}_4\text{H}_5\text{O}_6$               | 149.0092 (-4.8)                     | G, R=H                              |
| Si(OMe) <sub>4</sub> | 163.0241                                               | $\text{C}_5\text{H}_7\text{O}_6$               | 163.0248 (+4.1)                     | G, R=CH <sub>3</sub>                |
|                      | 354.9963                                               | $\text{SiC}_9\text{H}_{11}\text{O}_{13}^-$     | 354.9974 (+3.3)                     | J, n=0, 1×R=CH <sub>3</sub> , 2×R=H |
|                      | 369.0113                                               | $\text{SiC}_{10}\text{H}_{13}\text{O}_{13}^-$  | 369.0131 (+4.8)                     | J, n=0, 2×R=CH <sub>3</sub> , 1×R=H |
|                      | 383.0268                                               | $\text{SiC}_{11}\text{H}_{15}\text{O}_{13}^-$  | 383.0287 (+5.0)                     | J, n=0, 3×R=CH <sub>3</sub>         |
|                      | 396.9534                                               | $\text{Si}_2\text{C}_9\text{H}_9\text{O}_{14}$ | 396.9536 (+0.5)                     | L, n=0, 1×R=CH <sub>3</sub> , 2×R=H |

|                      |                                                                              |                                                                                     |
|----------------------|------------------------------------------------------------------------------|-------------------------------------------------------------------------------------|
| 410.9678             | Si <sub>2</sub> C <sub>10</sub> H <sub>11</sub> O <sub>14</sub> <sup>-</sup> | 410.9693 (+3.7) L, n=0, 2×R=CH <sub>3</sub> , 1×R=H                                 |
| 461.0055             | Si <sub>2</sub> C <sub>11</sub> H <sub>17</sub> O <sub>16</sub> <sup>-</sup> | 461.0061 (+1.2) J, n=1, 3×R=CH <sub>3</sub> , 2×R=H                                 |
| 475.0203             | Si <sub>2</sub> C <sub>12</sub> H <sub>19</sub> O <sub>16</sub> <sup>-</sup> | 475.0217 (+2.9) J, n=1, 4×R=CH <sub>3</sub> , 1×R=H                                 |
| 489.0360             | Si <sub>2</sub> C <sub>13</sub> H <sub>21</sub> O <sub>16</sub> <sup>-</sup> | 489.0374 (+2.9) J, n=1, 5×R=CH <sub>3</sub>                                         |
| 502.9628             | Si <sub>3</sub> C <sub>11</sub> H <sub>15</sub> O <sub>17</sub> <sup>-</sup> | 502.9623 (-1.1) L, n=1, 3×R=CH <sub>3</sub> , 2×R=H                                 |
| 516.9782             | Si <sub>3</sub> C <sub>12</sub> H <sub>17</sub> O <sub>17</sub> <sup>-</sup> | 516.9779 (-0.6) L, n=1, 4×R=CH <sub>3</sub> , 1×R=H                                 |
| 567.0160             | Si <sub>3</sub> C <sub>13</sub> H <sub>23</sub> O <sub>19</sub> <sup>-</sup> | 567.0147 (-2.3) J, n=2, 5×R=CH <sub>3</sub> , 2×R=H                                 |
| 581.0300             | Si <sub>3</sub> C <sub>14</sub> H <sub>25</sub> O <sub>19</sub> <sup>-</sup> | 581.0303 (+1.1) J, n=2, 6×R=CH <sub>3</sub> , 1×R=H                                 |
| 595.0447             | Si <sub>3</sub> C <sub>15</sub> H <sub>27</sub> O <sub>19</sub> <sup>-</sup> | 595.0460 (+2.2) J, n=2, 7×R=CH <sub>3</sub>                                         |
| 608.9714             | Si <sub>4</sub> C <sub>13</sub> H <sub>21</sub> O <sub>20</sub> <sup>-</sup> | 608.9709 (-0.8) L, n=2, 5×R=CH <sub>3</sub> , 2×R=H                                 |
| 622.9867             | Si <sub>4</sub> C <sub>14</sub> H <sub>23</sub> O <sub>20</sub> <sup>-</sup> | 622.9865 (-0.3) L, n=2, 6×R=CH <sub>3</sub> , 1×R=H                                 |
| 687.0386             | Si <sub>4</sub> C <sub>16</sub> H <sub>31</sub> O <sub>22</sub> <sup>-</sup> | 687.0390 (+0.6) J, n=3, 8×R=CH <sub>3</sub> , 1×R=H                                 |
| 701.0550             | Si <sub>4</sub> C <sub>17</sub> H <sub>33</sub> O <sub>22</sub> <sup>-</sup> | 701.0546 (-0.5) J, n=3, 9×R=CH <sub>3</sub>                                         |
| 793.0486             | Si <sub>5</sub> C <sub>18</sub> H <sub>37</sub> O <sub>25</sub> <sup>-</sup> | 793.0476 (-1.3) J, n=4, 10×R=CH <sub>3</sub> , 1×R=H                                |
| 807.0638             | Si <sub>5</sub> C <sub>19</sub> H <sub>39</sub> O <sub>25</sub> <sup>-</sup> | 806.9725 (-0.8) J, n=4, 11×R=CH <sub>3</sub>                                        |
| CA+                  | 191.0202 C <sub>6</sub> H <sub>7</sub> O <sub>7</sub> <sup>-</sup>           | 191.0197 (-2.5)                                                                     |
| Si(OMe) <sub>4</sub> |                                                                              | 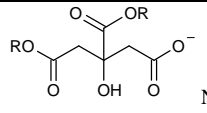   |
|                      |                                                                              | 2×R=H                                                                               |
| 205.0355             | C <sub>7</sub> H <sub>9</sub> O <sub>7</sub> <sup>-</sup>                    | 205.0354 (-0.7) N, 1×R=CH <sub>3</sub> , 1×R=H                                      |
| 406.9942             | SiC <sub>12</sub> H <sub>11</sub> O <sub>14</sub> <sup>-</sup>               | 406.9924 (-4.5)                                                                     |
|                      |                                                                              |   |
|                      |                                                                              | 3×R=H                                                                               |
| 421.0101             | SiC <sub>13</sub> H <sub>13</sub> O <sub>14</sub> <sup>-</sup>               | 421.0101 (-5.0) O, 1×R=CH <sub>3</sub> , 2×R=H                                      |
| 425.0031             | SiC <sub>12</sub> H <sub>13</sub> O <sub>15</sub> <sup>-</sup>               | 425.0029 (-0.4)                                                                     |
|                      |                                                                              |  |
|                      |                                                                              | n=0, 5×R=H                                                                          |
| 439.0189             | SiC <sub>13</sub> H <sub>15</sub> O <sub>15</sub> <sup>-</sup>               | 439.0186 (-0.7) P, n=0, 1×R=CH <sub>3</sub> , 4×R=H                                 |
| 453.0343             | SiC <sub>14</sub> H <sub>17</sub> O <sub>15</sub> <sup>-</sup>               | 453.0342 (-0.2) P, n=0, 2×R=CH <sub>3</sub> , 3×R=H                                 |
| 467.0500             | SiC <sub>15</sub> H <sub>19</sub> O <sub>15</sub> <sup>-</sup>               | 467.0499 (-0.4) P, n=0, 3×R=CH <sub>3</sub> , 2×R=H                                 |
| 516.9958             | Si <sub>2</sub> C <sub>13</sub> H <sub>17</sub> O <sub>18</sub> <sup>-</sup> | 516.9959 (+0.2) P, n=1, 1×R=CH <sub>3</sub> , 6×R=H                                 |
| 531.0116             | Si <sub>2</sub> C <sub>14</sub> H <sub>19</sub> O <sub>18</sub> <sup>-</sup> | 531.0115 (-0.1) P, n=1, 2×R=CH <sub>3</sub> , 5×R=H                                 |
| 545.0270             | Si <sub>2</sub> C <sub>15</sub> H <sub>21</sub> O <sub>18</sub> <sup>-</sup> | 545.0272 (+0.3) P, n=1, 3×R=CH <sub>3</sub> , 4×R=H                                 |
| 559.0424             | Si <sub>2</sub> C <sub>16</sub> H <sub>23</sub> O <sub>18</sub> <sup>-</sup> | 559.0428 (+0.8) P, n=1, 4×R=CH <sub>3</sub> , 3×R=H                                 |
| 573.0586             | Si <sub>2</sub> C <sub>17</sub> H <sub>25</sub> O <sub>18</sub> <sup>-</sup> | 573.0585 (-0.1) P, n=1, 5×R=CH <sub>3</sub> , 2×R=H                                 |
| 623.0015             | Si <sub>3</sub> C <sub>15</sub> H <sub>23</sub> O <sub>21</sub> <sup>-</sup> | 623.0045 (+4.8) P, n=2, 3×R=CH <sub>3</sub> , 6×R=H                                 |
| 637.0183             | Si <sub>3</sub> C <sub>16</sub> H <sub>25</sub> O <sub>21</sub> <sup>-</sup> | 637.0183 (+2.9) P, n=2, 4×R=CH <sub>3</sub> , 5×R=H                                 |
| 651.0326             | Si <sub>3</sub> C <sub>17</sub> H <sub>27</sub> O <sub>21</sub> <sup>-</sup> | 651.0358 (+4.9) P, n=2, 5×R=CH <sub>3</sub> , 4×R=H                                 |
| 665.0492             | Si <sub>3</sub> C <sub>18</sub> H <sub>29</sub> O <sub>21</sub> <sup>-</sup> | 665.0515 (+3.4) P, n=2, 6×R=CH <sub>3</sub> , 3×R=H                                 |

Table S2. Assignment of ES-MS spectra shown in Fig. 6

### FTIR analysis of 2HOA+ Si(OMe)<sub>4</sub> mixtures in d<sub>4</sub>-methanol

The mixtures of acids with Si(OMe)<sub>4</sub> in CD<sub>3</sub>OD as studied by NMR above were also studied by FTIR and their spectra compared with those recorded for the pure acid and pure ester (where available) at the same concentration in CD<sub>3</sub>OD (Table S3), as had previously been done with monocarboxylic acids<sup>31</sup>.

Spectra were recorded on a Perkin-Elmer Spectrum One instrument using a solid sample holder attachment. Acid (0.375 mmol) was dissolved completely in CD<sub>3</sub>OD (0.75 mL). Aliquots were withdrawn, spotted onto the sample holder, and spectra, corrected for the empty sample holder, were recorded. Si(OMe)<sub>4</sub> (0.750 mmol) was then added and the sample incubated at room temperature. Further spectra were recorded after varying intervals. Spectra were also recorded for CD<sub>3</sub>OD and Si(OMe)<sub>4</sub> in CD<sub>3</sub>OD controls.

The spectra recorded after 1 wk displayed signals previously assigned to CH<sub>3</sub>O[D/H] produced by hydrolysis/condensation of Si(OMe)<sub>4</sub><sup>31</sup>. Mixtures of Si(OMe)<sub>4</sub> with OA, MA, TA and CA displayed C-O and C=O stretch absorbances closer to those of the esters than those of the starting acids, as expected.

|    | C-O stretch |                   |                                          | C=O stretch |       |                                          | absorbance ~ 823 cm <sup>-1</sup> |       |                                          |
|----|-------------|-------------------|------------------------------------------|-------------|-------|------------------------------------------|-----------------------------------|-------|------------------------------------------|
|    | acid        | ester             | acid +<br>Si(OMe) <sub>4</sub> ,<br>1 wk | acid        | ester | acid +<br>Si(OMe) <sub>4</sub> ,<br>1 wk | acid                              | ester | acid +<br>Si(OMe) <sub>4</sub> ,<br>1 wk |
| OA | 1238        | 1219 <sup>b</sup> | 1224 <sup>a</sup>                        |             | 1708  |                                          | 823                               | 823   | 816                                      |
|    |             | 1334 <sup>b</sup> |                                          | 1747        | 1748  | 1748                                     |                                   |       |                                          |
|    | 1398        | 1367 <sup>b</sup> | 1361                                     |             | 1774  | 1771                                     |                                   |       |                                          |
| MA | 1317        | 1288 <sup>c</sup> | 1306                                     | 1727        | 1746  | 1742                                     | 824                               | 824   | 804                                      |
|    | 1385        | 1372 <sup>c</sup> | 1386                                     |             |       |                                          |                                   |       |                                          |
| TA | 1310        | 1282 <sup>d</sup> | 1292                                     | 1732        | 1754  | 1753                                     | 823                               | 824   | 807                                      |
|    | 1373        | 1367 <sup>d</sup> | 1371                                     |             |       |                                          |                                   |       |                                          |
| CA | 1249        | 1207 <sup>e</sup> | 1230 <sup>a</sup>                        | 1726        | 1746  | 1742                                     | 823                               | 825   | 810                                      |
|    | 1383        | 1364 <sup>e</sup> | 1368                                     |             |       |                                          |                                   |       |                                          |

Table S3: Selected FTIR absorbances for the various acids, their esters, and their mixtures with Si(OMe)<sub>4</sub> after 1 wk, all recorded in CD<sub>3</sub>OD. <sup>a</sup> Overlaps with bands due to Si(OMe)<sub>4</sub> and/or MeOH at ~ 1200 cm<sup>-1</sup>. <sup>b</sup> dimethyloxalate <sup>c</sup> dimethyl L-malate <sup>d</sup> dimethyl L-tartrate <sup>e</sup> trimethyl citrate.

The absorbance in the 750-850 cm<sup>-1</sup> region of the spectra of the mixtures is again included in table S3. The only absorbance observed in this region with pure samples of the acids and esters was the band at ~823 cm<sup>-1</sup> attributed to CD<sub>3</sub>OD. Ignatyev *et al.* suggest two Si-O stretches appear at 843 and 827 cm<sup>-1</sup> in Si(OCH<sub>3</sub>)<sub>4</sub> but at 801 and 779 cm<sup>-1</sup> for Si(OCD<sub>3</sub>)<sub>4</sub>. For Si(OCH<sub>3</sub>)<sub>4</sub>+H<sub>2</sub>O in CD<sub>3</sub>OD this band appears initially at 832 cm<sup>-1</sup> and after 1 wk at 821 cm<sup>-1</sup> due to the replacement of SiOCH<sub>3</sub> with SiOCD<sub>3</sub>. Interestingly with Si(OMe)<sub>4</sub>+acetic acid and Si(OMe)<sub>4</sub>+3-hydroxybutyric acid in CD<sub>3</sub>OD this band moved further, to 798 cm<sup>-1</sup>, as more SiOCD<sub>3</sub> was present after 1 week<sup>31</sup>. In the current work the band moves further for MA than for OA, TA and CA, corresponding with the <sup>13</sup>C results which suggest more SiOCD<sub>3</sub> is present after 1 wk in the MA+ Si(OMe)<sub>4</sub> sample.

Samples of acid+ Si(OMe)<sub>4</sub> in CD<sub>3</sub>OD that had been incubated for just 30 min were also subjected to FTIR in the hope that this might show evidence of different absorbances that might be attributed Si-acid complexes or other reaction intermediates. However, these spectra were essentially intermediate between the initial spectra for the acids alone and the spectra recorded for acids+ Si(OMe)<sub>4</sub> at 1 week, suggesting any absorbances due to transient siloxane-acid complexes were weak and/or obscured by the other absorbances.

### <sup>13</sup>C, <sup>1</sup>H and <sup>29</sup>Si NMR and ESI-MS of TA/ Si(OEt)<sub>4</sub> mixtures

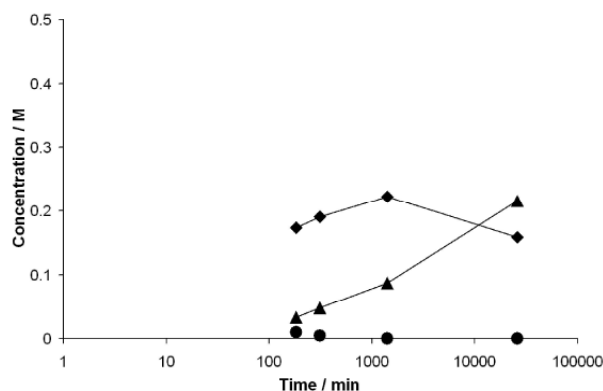

Figure S2: Concentrations of product monoester (diamonds), diester (triangles) and transient intermediate (circles) *versus* time for the mixture of TA (0.40M) with Si(OEt)<sub>4</sub> (0.79 M) in C<sub>2</sub>D<sub>5</sub>OD.

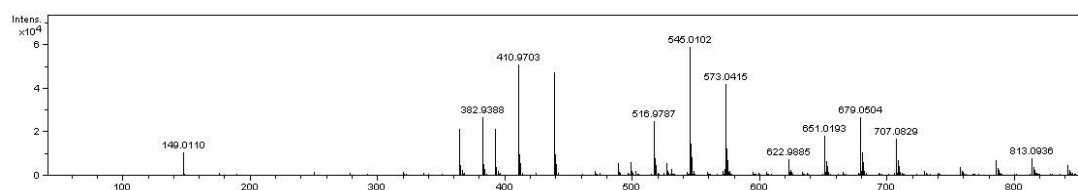

Figure S3 ES-MS spectra obtained in negative ion mode with direct infusion of samples. Si(OEt)<sub>4</sub> (0.79 M)+ TA (0.40 M) in EtOH, collected *c.* 2h after mixing.

|                          |          |                                                                              |                  |                                                   |
|--------------------------|----------|------------------------------------------------------------------------------|------------------|---------------------------------------------------|
| TA+ Si(OEt) <sub>4</sub> | 149.0110 | C <sub>4</sub> H <sub>5</sub> O <sub>6</sub> <sup>-</sup>                    | 149.0092 (-12.7) | G, R=H                                            |
|                          | 364.9278 | Si <sub>2</sub> C <sub>8</sub> H <sub>5</sub> O <sub>13</sub> <sup>-</sup>   | 364.9274 (-1.1)  | K, R=H                                            |
|                          | 382.9389 | Si <sub>2</sub> C <sub>8</sub> H <sub>7</sub> O <sub>14</sub> <sup>-</sup>   | 382.9380 (-2.5)  | L, n=0, 3×R=H                                     |
|                          | 392.9599 | Si <sub>2</sub> C <sub>10</sub> H <sub>9</sub> O <sub>13</sub> <sup>-</sup>  | 392.9587 (-3.0)  | K, R=C <sub>2</sub> H <sub>5</sub>                |
|                          | 410.9703 | Si <sub>2</sub> C <sub>10</sub> H <sub>11</sub> O <sub>14</sub> <sup>-</sup> | 410.9693 (-2.5)  | L, n=0, 1×R=C <sub>2</sub> H <sub>5</sub> , 2×R=H |
|                          | 439.0017 | Si <sub>2</sub> C <sub>12</sub> H <sub>15</sub> O <sub>14</sub> <sup>-</sup> | 439.0006 (-2.5)  | L, n=0, 2×R=C <sub>2</sub> H <sub>5</sub> , 1×R=H |
|                          | 488.9473 | Si <sub>3</sub> C <sub>10</sub> H <sub>13</sub> O <sub>17</sub> <sup>-</sup> | 488.9466 (-1.5)  | L, n=1, 1×R=C <sub>2</sub> H <sub>5</sub> , 4×R=H |
|                          | 498.9678 | Si <sub>3</sub> C <sub>12</sub> H <sub>15</sub> O <sub>16</sub> <sup>-</sup> | 498.9673 (-0.9)  | M, 2×R=C <sub>2</sub> H <sub>5</sub> , 1×R=H      |
|                          | 516.9786 | Si <sub>3</sub> C <sub>12</sub> H <sub>17</sub> O <sub>17</sub> <sup>-</sup> | 516.9779 (-1.4)  | L, n=1, 2×R=C <sub>2</sub> H <sub>5</sub> , 3×R=H |
|                          | 545.0101 | Si <sub>3</sub> C <sub>14</sub> H <sub>21</sub> O <sub>17</sub> <sup>-</sup> | 545.0092 (-1.6)  | L, n=1, 3×R=C <sub>2</sub> H <sub>5</sub> , 2×R=H |
|                          | 573.0413 | Si <sub>3</sub> C <sub>16</sub> H <sub>25</sub> O <sub>17</sub> <sup>-</sup> | 573.0405 (-1.3)  | L, n=1, 4×R=C <sub>2</sub> H <sub>5</sub> , 1×R=H |
|                          | 622.9880 | Si <sub>4</sub> C <sub>14</sub> H <sub>23</sub> O <sub>20</sub> <sup>-</sup> | 622.9865 (-2.4)  | L, n=2, 3×R=C <sub>2</sub> H <sub>5</sub> , 4×R=H |
|                          | 651.0191 | Si <sub>4</sub> C <sub>16</sub> H <sub>27</sub> O <sub>20</sub> <sup>-</sup> | 651.0178 (-2.0)  | L, n=2, 4×R=C <sub>2</sub> H <sub>5</sub> , 3×R=H |
|                          | 679.0507 | Si <sub>4</sub> C <sub>18</sub> H <sub>31</sub> O <sub>20</sub> <sup>-</sup> | 679.0491 (-2.3)  | L, n=2, 5×R=C <sub>2</sub> H <sub>5</sub> , 2×R=H |
|                          | 707.0827 | Si <sub>4</sub> C <sub>20</sub> H <sub>35</sub> O <sub>20</sub> <sup>-</sup> | 707.0804 (-3.3)  | L, n=2, 6×R=C <sub>2</sub> H <sub>5</sub> , 1×R=H |

Table S4 Assignment of ES-MS spectrum shown in figure S3.
